# Supplementary material for: XX/XY System of Sex Determination in the Geophilomorph Centipede Strigamia maritima
Source: PLoS One. 2016 Feb 26;11(2):e0150292. doi: 10.1371/journal.pone.0150292 (PMC4769173; doi:10.1371/journal.pone.0150292)
Supplement: S1 Table — (XLSX) [file pone.0150292.s003.xlsx]

## Sheet: Table S1
Candidate X-linked scaffolds		Validated X-linked scaffolds	Candidate Y-linked scaffolds	Validated Y-linked scaffolds
scf7180001247494	scf7180001244064	scf7180001248200	scf7180001243011	scf7180001247258
scf7180001238223	scf7180001247451	scf7180001248049	scf7180001247070	scf7180001245067
scf7180001248200	scf7180001237926	scf7180001247190	scf7180001247694	scf7180001243011
scf7180001247325	scf7180001240890		scf7180001244055	scf7180001247286
scf7180001248515	scf7180001248180		scf7180001241743	scf7180001247324
scf7180001248470	scf7180001239274		scf7180001247305	scf7180001247297
scf7180001246674	scf7180001247441		scf7180001247410
scf7180001248731	scf7180001240217		scf7180001247565
scf7180001237805	scf7180001247929		scf7180001236102
scf7180001247964	scf7180001239495		scf7180001247324
scf7180001247190	scf7180001247138		scf7180001247458
scf7180001248670	scf7180001235053		scf7180001241418
scf7180001242730	scf7180001247178		scf7180001247606
scf7180001240400	scf7180001248831		scf7180001245067
scf7180001247422	scf7180001242384		scf7180001239563
scf7180001247720	scf7180001247579		scf7180001247297
scf7180001247115	scf7180001248520		scf7180001247338
scf7180001248770	scf7180001248010		scf7180001247286
scf7180001247094	scf7180001248165		scf7180001247773
scf7180001238131	scf7180001244770		scf7180001247292
scf7180001247172	scf7180001235343		scf7180001239701
scf7180001236369	scf7180001248865		scf7180001247521
scf7180001248318	scf7180001243946		scf7180001247258
scf7180001247585	scf7180001248553		scf7180001245002
scf7180001248665	scf7180001247459
scf7180001238373	scf7180001236314
scf7180001248764	scf7180001237147
scf7180001234899	scf7180001235412
scf7180001245433	scf7180001247433
scf7180001248724	scf7180001236724
scf7180001248661	scf7180001237329
scf7180001244255	scf7180001235461
scf7180001248126	scf7180001246161
scf7180001247735	scf7180001247973
scf7180001247310
